# Supplementary material for: Mitochondrial Ribosome Dysfunction in Human Alveolar Type II Cells in Emphysema
Source: MDPI journal article supplement (doi:10.3390/biomedicines10071497), 2022-06-24
Supplement: s1 [file s1]

## **SUPPLEMENTARY MATERIALS AND METHODS**

### **Mitochondrial ribosome dysfunction in human alveolar type II cells in emphysema**

Loukmane Karim<sup>1,2</sup>, Chih-Ru Lin<sup>1,2</sup>, Beata Kosmider<sup>1,2,3</sup>, Gerard Criner<sup>3</sup>, Nathaniel Marchetti<sup>3</sup>,  
Sudhir Bolla<sup>3</sup>, Russell Bowler<sup>4</sup>, Karim Bahmed<sup>2,3\*</sup>

<sup>1</sup> Department of Microbiology, Immunology, and Inflammation, Temple University, Philadelphia,  
PA 19140, USA

<sup>2</sup> Center for Inflammation and Lung Research, Temple University, Philadelphia, PA 19140, USA

<sup>3</sup> Department of Thoracic Medicine and Surgery, Temple University, Philadelphia, PA 19140,  
USA

<sup>4</sup> Department of Medicine, National Jewish Health, Denver, CO 80206, USA

\*Corresponding author:

Karim Bahmed, Ph.D.

Department of Thoracic Medicine and Surgery

Center for Inflammation and Lung Research

Temple University

3500 N. Broad Street

Philadelphia, PA 19140

E-mail: karim.bahmed@temple.edu

### **Lung tissue cores**

Lung tissue cores were obtained from areas with mild and severe emphysema of the same patient as we previously described (1). Briefly, a computed tomography (CT) scans were performed as we previously published. Tissue cores were collected from areas with mild and severe emphysema. Emphysema was quantified by the percent of the lung voxels on inspiratory CT scan with attenuation  $< -950$  HU (Insp-950). Emphysema was considered absent in subjects with values for  $\text{Insp-950} < 4\%$  in smokers, to account for the fact that the increased lung density in smokers results in a decrease in emphysema index. Severe emphysema was defined by  $\text{Insp-950} > 14\%$  in smokers.

## References

1. Kosmider B, Lin CR, Karim L, Tomar D, Vlasenko L, Marchetti N, Bolla S, Madesh M, Criner GJ, and Bahmed K. Mitochondrial dysfunction in human primary alveolar type II cells in emphysema. *EBioMedicine* 46: 305-316, 2019.

**Table S1.** Primers used for RT-PCR.

| Gene             |   | Primer's sequence (5'- 3') |
|------------------|---|----------------------------|
| ASncmtRNA-1      | F | TAGGGATAACAGCGCAATCCTATT   |
|                  | R | CACACCCACCCAAGAACAGG       |
| ASncmtRNA-2      | F | ACCGTGCAAAGGTAGCATAATC     |
|                  | R | CAAGAACAGGGTTTGTTAGG       |
| ATP5A            | F | ATGACGACTTATCCAAACAGGC     |
|                  | R | CGGGAGTGTAGGTAGAACCACT     |
| COX1             | F | GGAGCAGGAACAGGTTGAACAG     |
|                  | R | GTTGTGATGAAATTGATGGC       |
| COX2             | F | CCCTTACCATCAAATCAATTGGCC   |
|                  | R | ATTGTCAACGTCAAGGAGTCGC     |
| COX4             | F | CAGGGTATTTAGCCTAGTTGGC     |
|                  | R | GCCGATCCATATAAGCTGGGA      |
| COX5A            | F | CATTGATGCTGCTTTGCGGG       |
|                  | R | AGCCCATCCATGCGGTTTAC       |
| CYTB             | F | CTGATCCTCCAAATCACCACAG     |
|                  | R | GCGCCATTGGCGTGAAGGTA       |
| GAPDH            | F | GGAGCGAGATCCCTCCAAAAT      |
|                  | R | GGCTGTTGTCATACTTCTCATGG    |
| MRPL48           | F | ATGAGCGGAACCTTGGAAG        |
|                  | R | CCACCTACAGAATAGATGGGCT     |
| MRPS27           | F | GGCTATGCACTTCTTGGAAG       |
|                  | R | GCACATCGAGCGCTTCTCTAC      |
| ND1              | F | CTACTACAACCCTTCGCTGAC      |
|                  | R | GGATTGAGTAAACGGCTAGGC      |
| NDUFS1           | F | TTAGCAAATCACCCATTGGACTG    |
|                  | R | CCCCTCTAAAAATCGGCTCCTA     |
| PTCD1            | F | GCCCAAATTATGGCGAGGC        |
|                  | R | AGGGCTTCAACCAGCTTCC        |
| PTCD3            | F | ACAACAGACTCCATGCTGATGT     |
|                  | R | AAGCGAGGGTTCTATTCCAATG     |
| 12S-16S junction | F | GAGGAGACAAGTCGTAACATGG     |
|                  | R | CTATATCTATTGCGCCAGGTTTC    |
| RNR1 (12S rRNA)  | F | TAGAGGAGCCTGTTCTGTAATCGAT  |
|                  | R | CGACCCTTAAGTTTCATAAGGGCTA  |
| RNR2 (16S rRNA)  | F | CCTGGTGATAGCTGGTTGTCC      |
|                  | R | CAATTGGGTGTGAGGAGTTCAG     |
| SDHB             | F | GACACCAACCTCAATAAGGTCTC    |
|                  | R | GGCTCAATGGATTTGTACTGTGC    |
| SncmtRNA         | F | ACAACCAGCTATCACCAG         |
|                  | R | AGGTTTAGCCAAACCATT         |

|                |   |                           |
|----------------|---|---------------------------|
| UQCRC2         | F | TTCAGCAATTTAGGAACCACCC    |
|                | R | GGTCACACTTAATTTGCCACCAA   |
| U6             | F | GCTTCGGCAGCACATATACTAAAAT |
|                | R | CGCTTCACGAATTTGCGTGTCAT   |
| Common Reverse | R | CGAGGAAGAAGACGGAAGAAT     |
| miR-1973       | F | ACCGTGCAAAGGTAGCAT        |
| miR-4485-3p    | F | TAACGGCCGCGGTACC          |
