# Supplementary material for: Mitochondrial Ribosome Dysfunction in Human Alveolar Type II Cells in Emphysema
Source: MDPI journal article supplement (doi:10.3390/biomedicines10071497), 2022-06-24
Supplement: s1 [file s1]

## **SUPPLEMENTARY RESULTS**

### **Mitochondrial ribosome dysfunction in human alveolar type II cells in emphysema**

Loukmane Karim<sup>1,2</sup>, Chih-Ru Lin<sup>1,2</sup>, Beata Kosmider<sup>1,2,3</sup>, Gerard Criner<sup>3</sup>, Nathaniel Marchetti<sup>3</sup>,  
Sudhir Bolla<sup>3</sup>, Russell Bowler<sup>4</sup>, Karim Bahmed<sup>2,3\*</sup>

<sup>1</sup> Department of Microbiology, Immunology, and Inflammation, Temple University, Philadelphia,  
PA 19140, USA

<sup>2</sup> Center for Inflammation and Lung Research, Temple University, Philadelphia, PA 19140, USA

<sup>3</sup> Department of Thoracic Medicine and Surgery, Temple University, Philadelphia, PA 19140,  
USA

<sup>4</sup> Department of Medicine, National Jewish Health, Denver, CO 80206, USA

\*Corresponding author:

Karim Bahmed, Ph.D.

Department of Thoracic Medicine and Surgery

Center for Inflammation, Translational and Clinical Lung Research

Temple University

3500 N. Broad Street

Philadelphia, PA 19140

E-mail: karim.bahmed@temple.edu

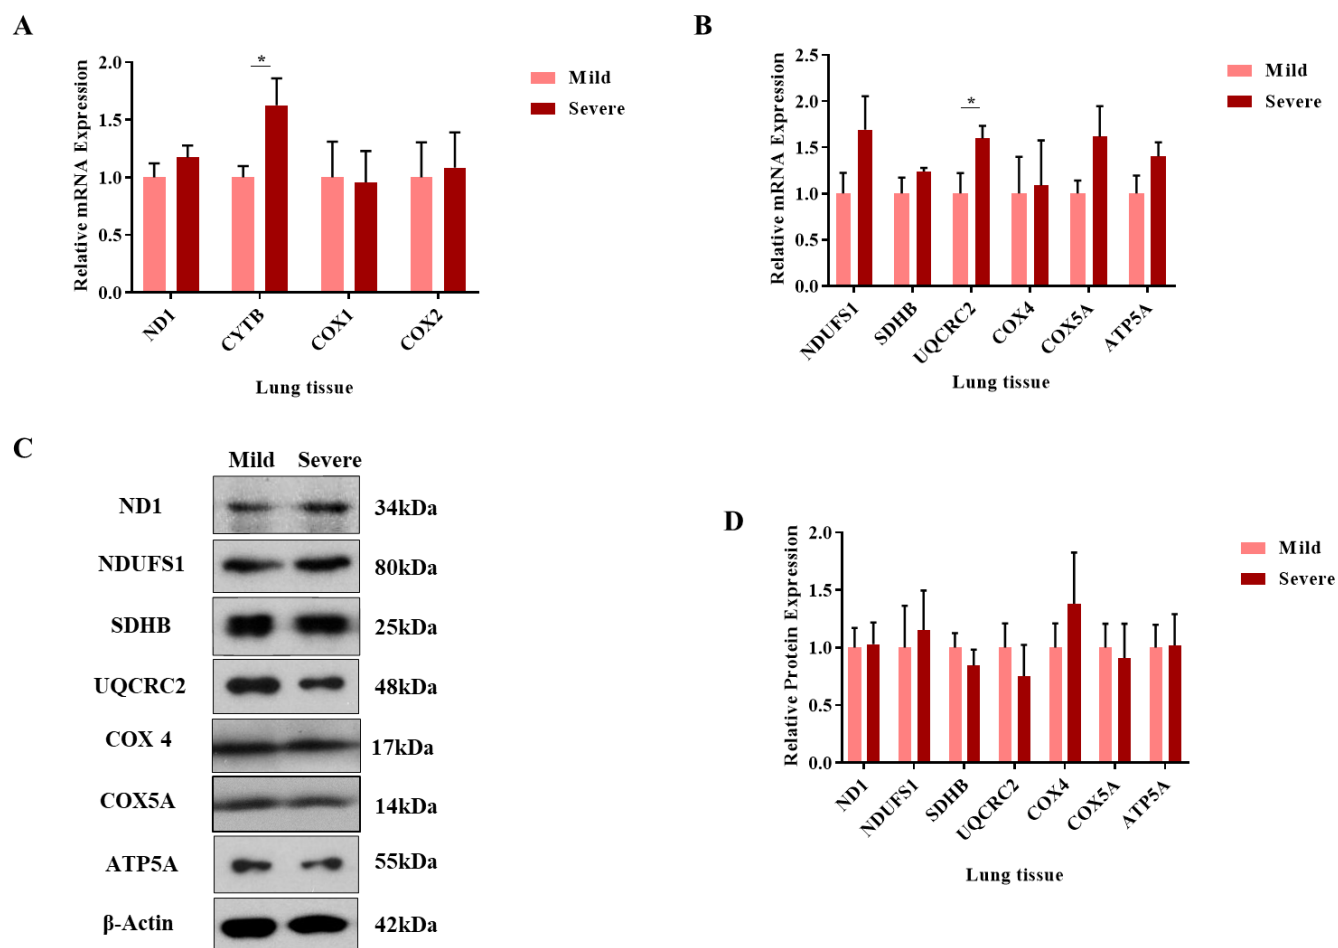

**Figure S1. Expression of mitochondrial genes and proteins in areas with mild and severe emphysema in lung tissue.** Expression of mitochondria-encoded (A) and nuclear-encoded (B) mitochondrial genes was analyzed by RT-PCR and normalized to GAPDH levels. Protein expression was determined by Western blotting (C). Data were normalized to  $\beta$ -actin (D) and are shown as means  $\pm$  s.e.m (N=5-6 per group; \*  $P < 0.05$ ).

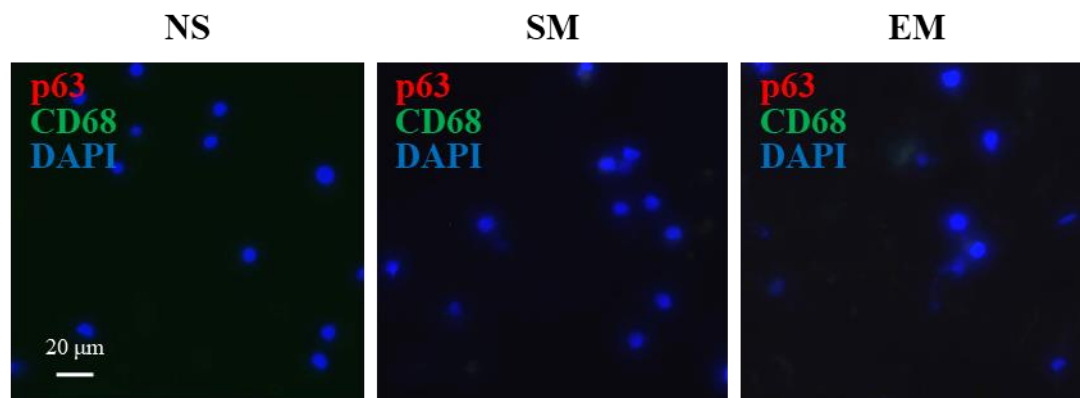

**Figure S2. Purity of primary ATII cells.** Cytopins of freshly isolated ATII cells were stained for p63, CD68 and DAPI using immunofluorescence (N=3 lungs per group). Scale bar, 20  $\mu\text{m}$ .

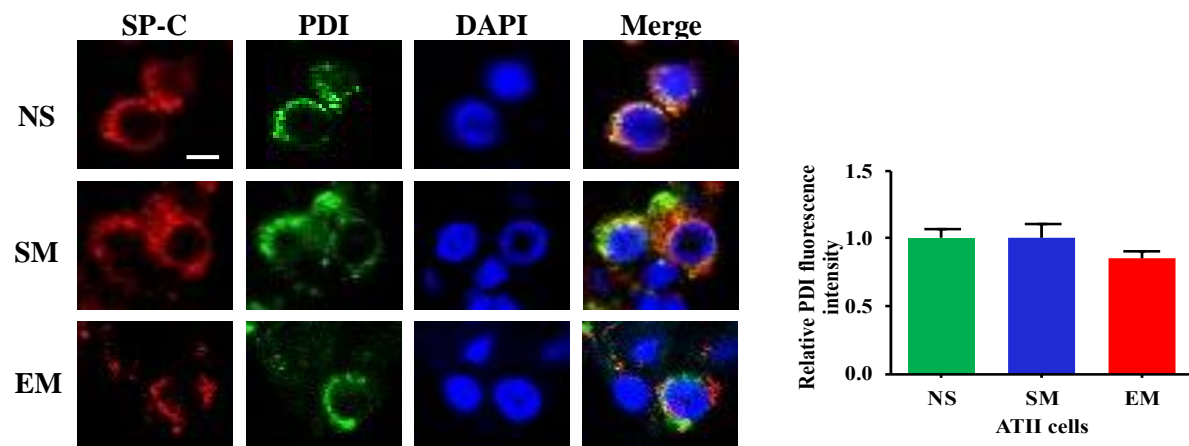

**Figure S3. Expression of PDI in ATII cells.** PDI fluorescence intensity was analyzed in freshly isolated ATII cells stained with SP-C by immunofluorescence (N=3 per group; scale bar, 5  $\mu$ m).

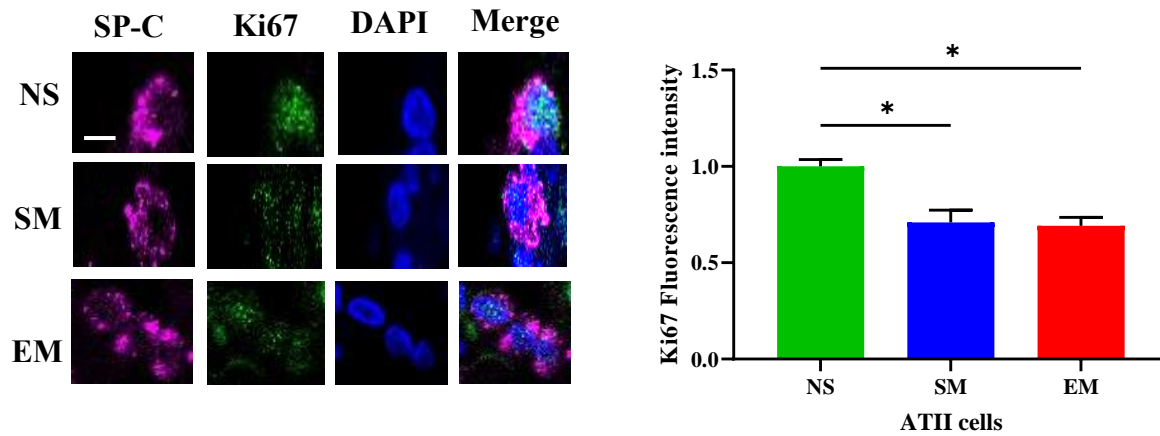

**Figure S4. Ki67 expression in ATII cells.** Lung tissue was obtained from nonsmokers (NS), smokers (SM), and emphysema patients (EM). ATII cells were identified using SP-C antibody by immunofluorescence). Quantification of Ki67 fluorescence intensity is shown. Data are shown as means  $\pm$  s.e.m (N=3-4 per group; \*  $P < 0.05$ ; scale bar, 10  $\mu$ m).

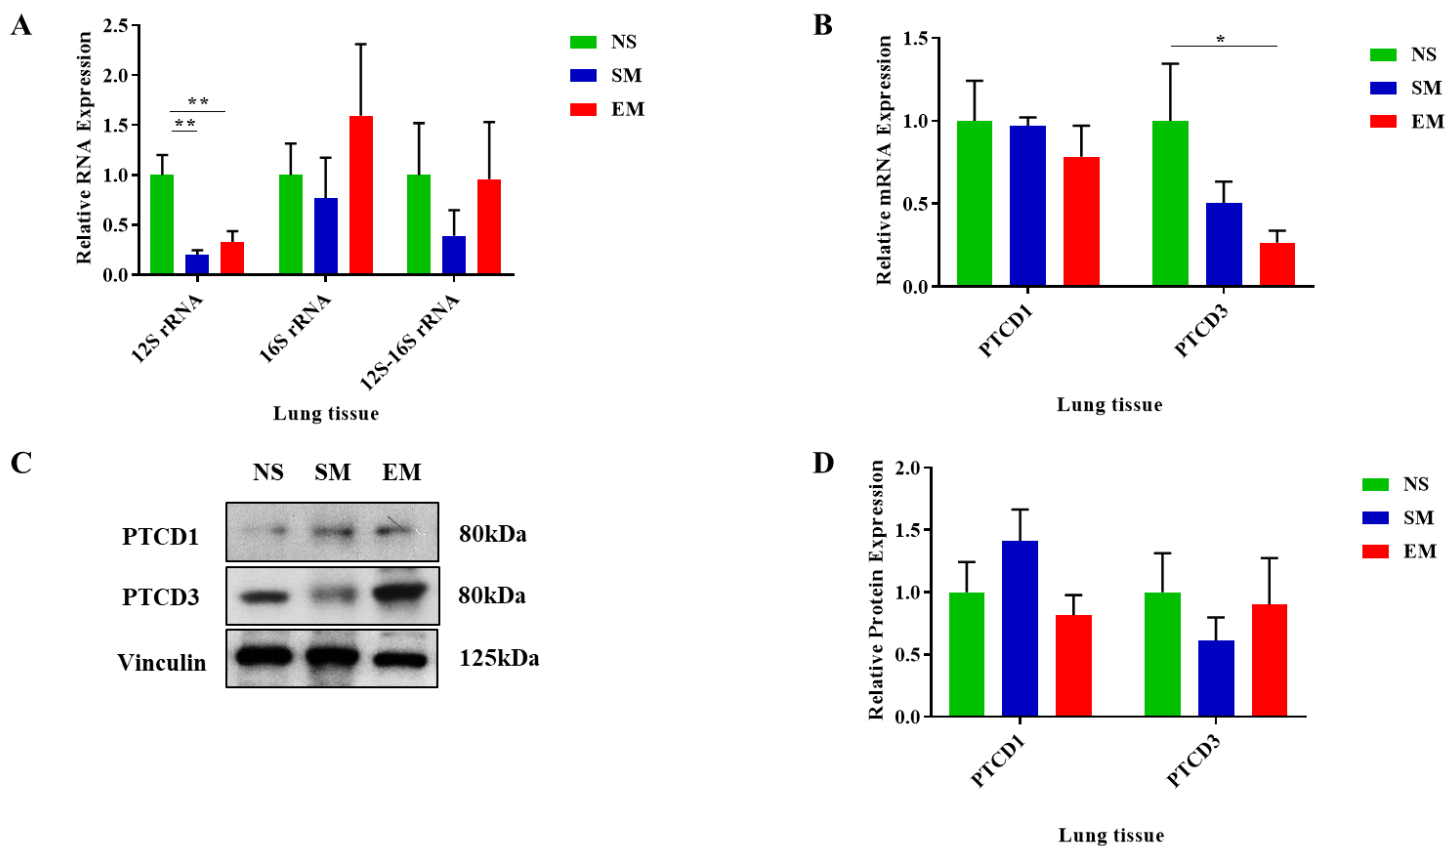

**Figure S5. Expression of mitoribosome components, PTC1 and PTC3 in lung tissue.** **A**– Expression of mitoribosomal 12S, 16S and the junction 12S-16S rRNA was assessed in lung tissue obtained from nonsmokers (NS), smokers (SM) and emphysema patients (EM) by RT-PCR. PTC1 and PTC3 mRNA and protein expression was evaluated by RT-PCR (**B**) and Western blotting (**C**), respectively. **D** – Protein quantification by densitometry analysis and normalization to vinculin is shown. Data were presented as means  $\pm$  s.e.m (N=4-14 per group; \*  $P < 0.05$ ; \*\*  $P < 0.01$ ).

**A**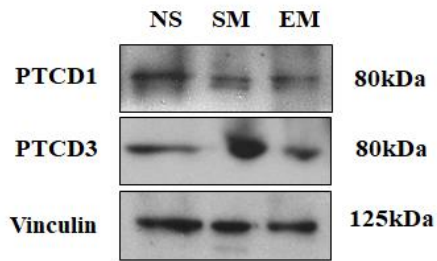**B**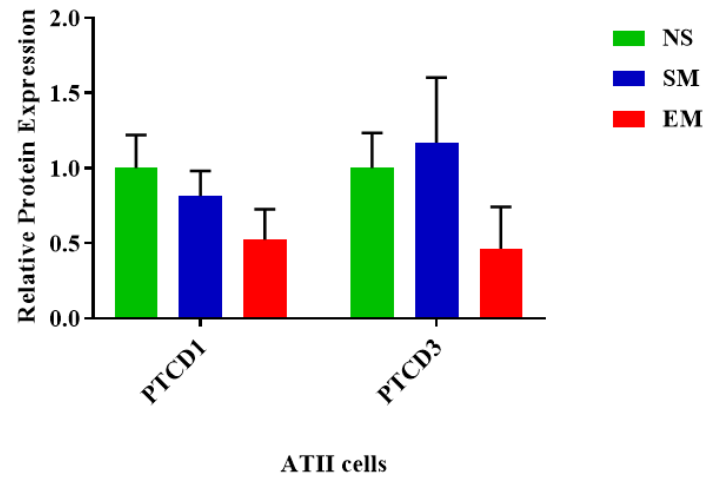

**Figure S6. Expression of PTCD1 and PTCD3 in ATII cells.** **A** - PTCD1 and PTCD3 expression was evaluated by Western blotting in ATII cells isolated from nonsmokers (NS), smokers (SM) and emphysema patients (EM). **B** – Protein quantification by densitometry analysis and normalization to vinculin is shown. Data were presented as means  $\pm$  s.e.m (N=4-14 per group).

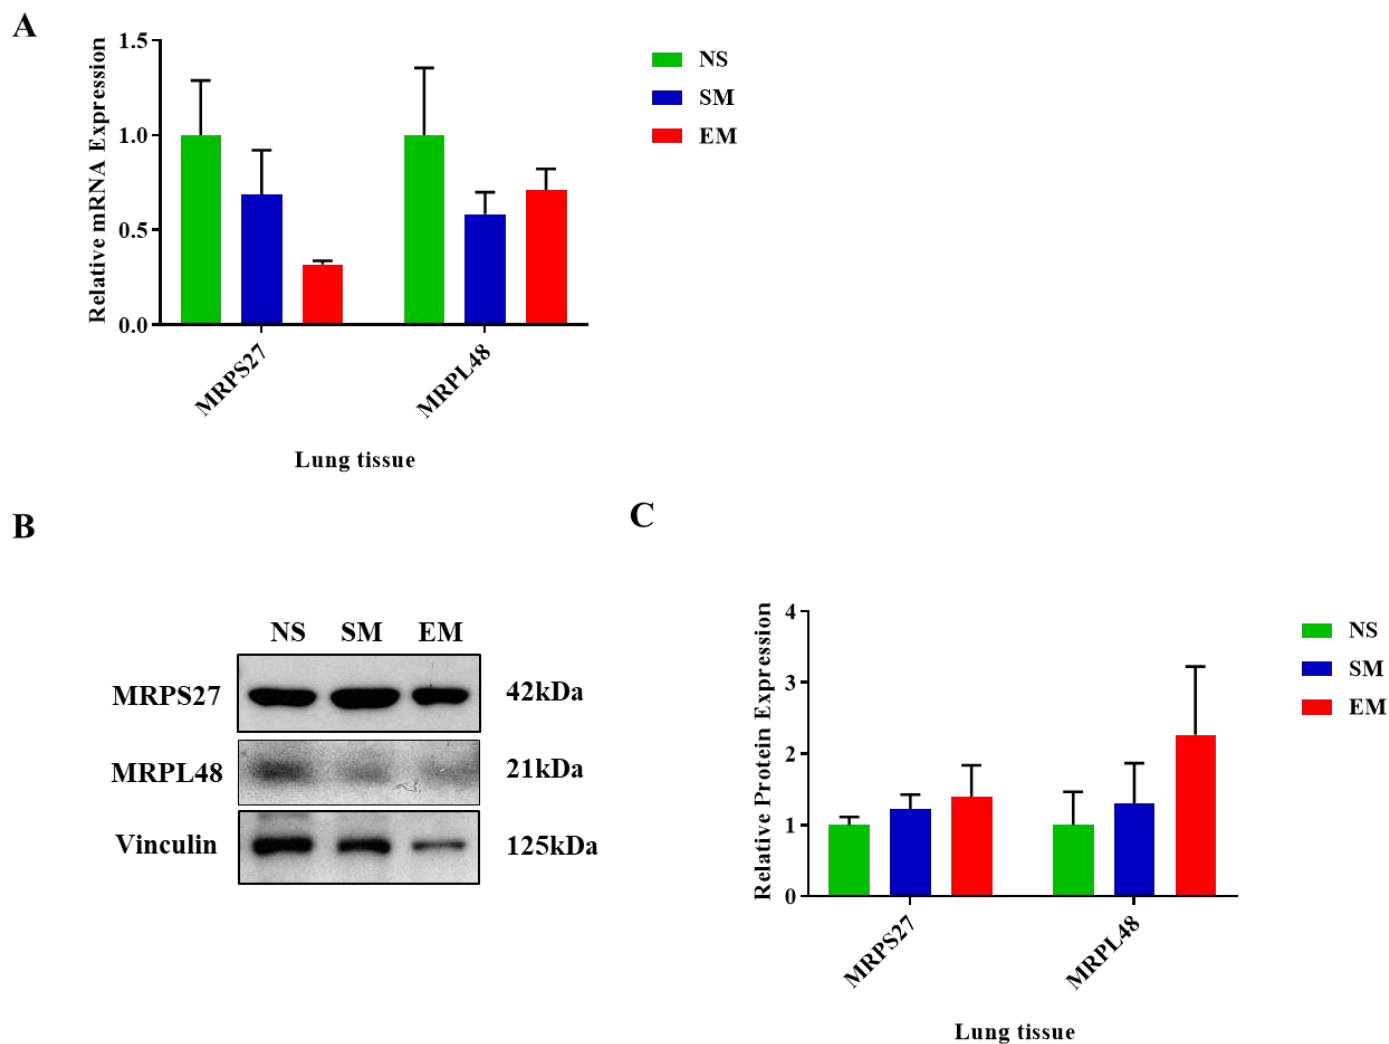

**Figure S7. Expression of mitoribosome components in lung tissue.** Lung tissue was obtained from nonsmokers (NS), smokers (SM) and emphysema patients (EM). MRPS27 and MRPL48 mRNA and protein expression was analyzed by RT-PCR (**A**) and Western blotting (**B**), respectively. **C** – Protein quantification by densitometry analysis and normalization to vinculin is shown. Data were presented as means  $\pm$  s.e.m (N=4-14 per group).



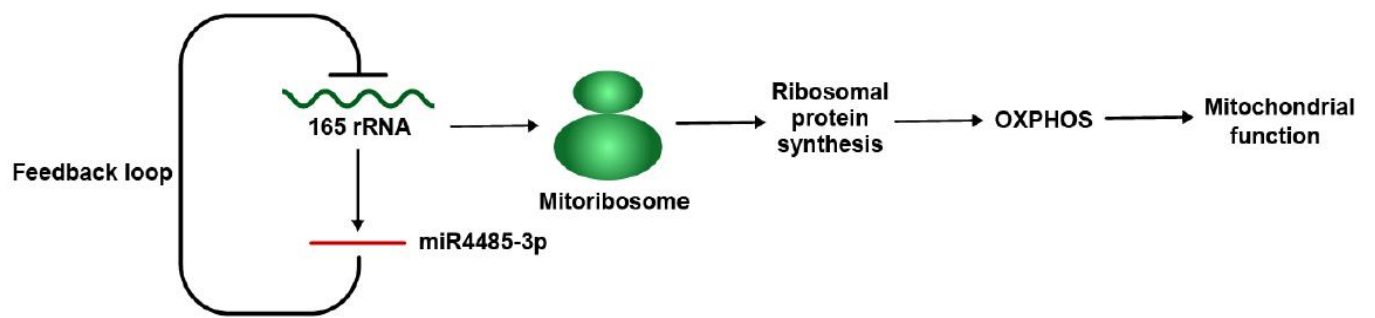

**Figure S8. Model of the miR4485-3p-mediated negative feedback loop.**

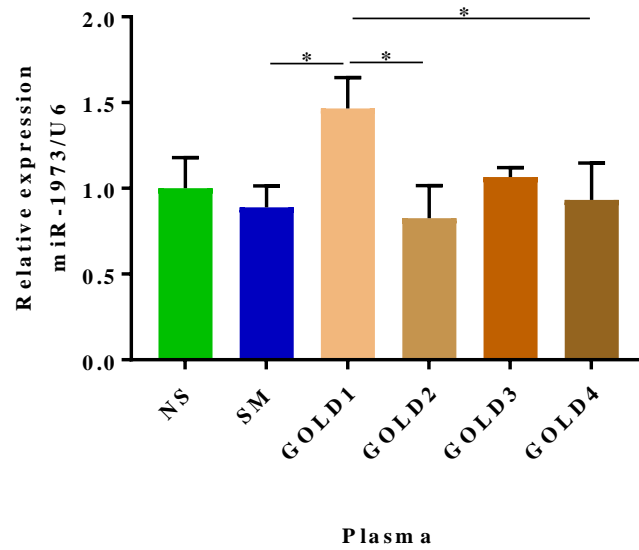

**Figure S9. Circulating miR1973 expression in plasma.** Plasma samples were obtained from nonsmokers (NS), smokers (SM) and COPD (GOLD1 to GOLD4). Expression of circulating miR1973 was determined by RT-PCR and results were normalized to U6. Data are shown as means  $\pm$  s.e.m (N=4-9 per group; \*  $P < 0.05$ ).
